# Supplementary figures and images for: Ginseng polysaccharides alter the gut microbiota and kynurenine/tryptophan ratio, potentiating the antitumour effect of antiprogrammed cell death 1/programmed cell death ligand 1 (anti-PD-1/PD-L1) immunotherapy
Source: HighWire-hosted journal article supplement (doi:10.1136/gutjnl-2020-321031), 2021-05-18

Supplementary Figure 2

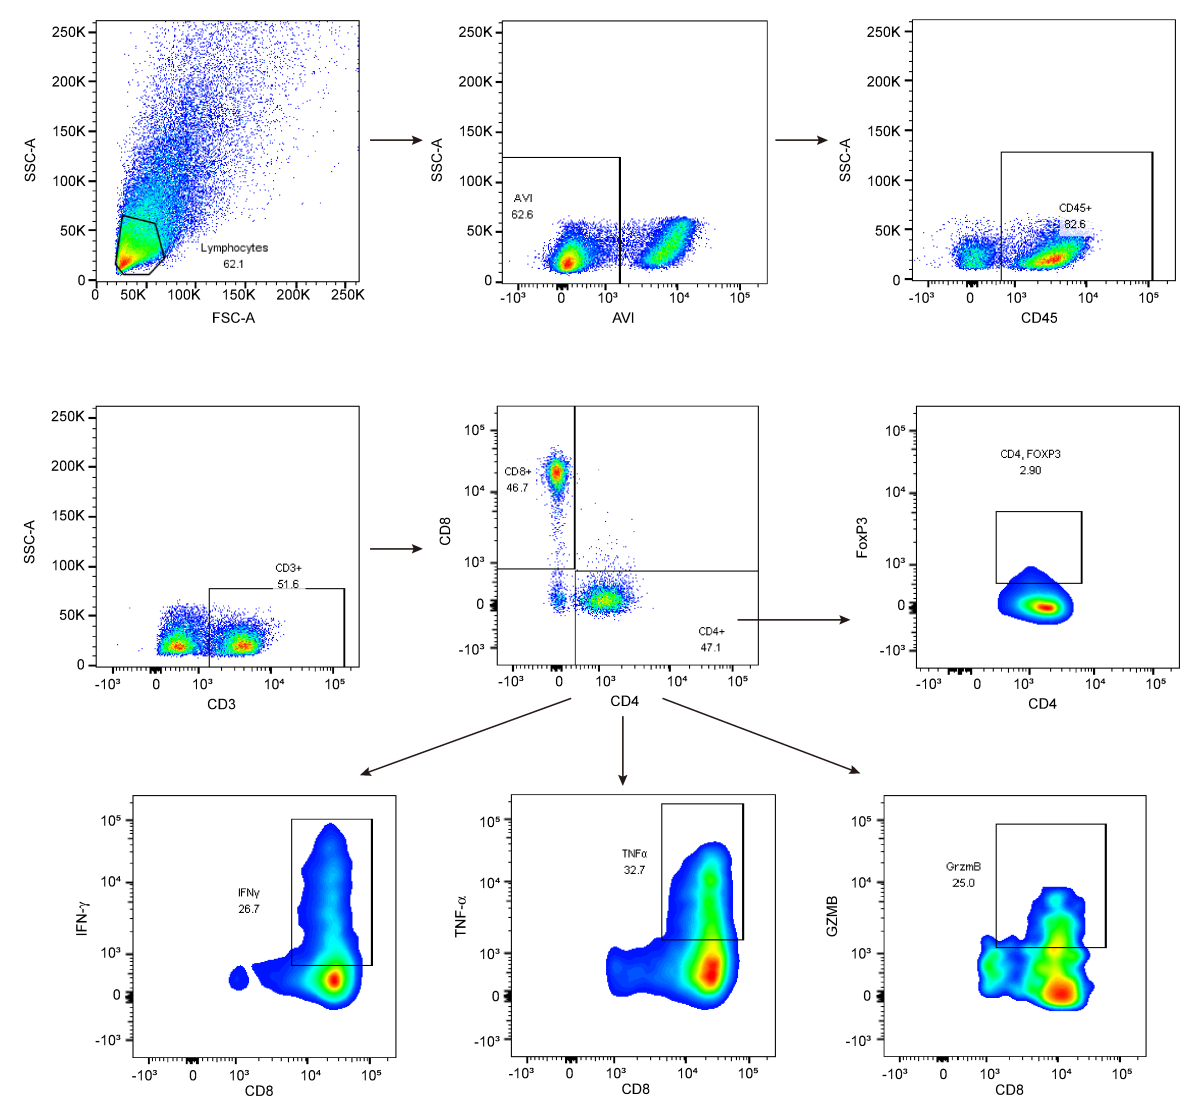

Supplement: gutjnl-2020-321031supp003_data_supplement.pdf [file gutjnl-2020-321031supp003_data_supplement.pdf]
